# Supplementary material for: Association of preoperative clinical frailty and clinical outcomes in elderly patients with stable coronary artery disease after percutaneous coronary intervention
Source: Springer Nature journal article supplement (doi:10.1007/s00380-023-02276-3), 2023-06-07
Supplement: MOESM1 [file 25459510]

**Association of preoperative clinical frailty and clinical outcomes in elderly patients with stable coronary artery disease after percutaneous coronary intervention**

## **Heart and Vessels**

Hirokazu Shimono, MD,<sup>1</sup> Akihiro Tokushige, MD.PhD,<sup>\*3,4</sup> Daisuke Kanda, MD.PhD,<sup>2</sup> Ayaka Ohno, MD,<sup>1</sup> Masao Hayashi, MD,<sup>1</sup> Mana Fukuyado, MD,<sup>1</sup> Mitumasa Akao, MD,<sup>1</sup> Mariko Kawasoe, MD,<sup>1</sup> Ryo Arikawa MD,<sup>1</sup> Hideaki Otsuji, MD,<sup>1</sup> Hideto Chaen, MD.PhD,<sup>1</sup> Hideki Okui, MD.PhD,<sup>1</sup> Naoya Oketani, MD.PhD,<sup>1</sup> and Mitsuru Ohishi, MD.PhD.FJCC<sup>2,3</sup>

<sup>1</sup>Department of Cardiovascular Medicine, Kagoshima City Hospital, Kagoshima, Japan

<sup>2</sup>Department of Cardiovascular Medicine and Hypertension, Graduate School of Medical and Dental Sciences, Kagoshima University, Kagoshima, Japan

<sup>3</sup>Department of Prevention and Analysis of Cardiovascular Diseases, Graduate School of Medical and Dental Sciences, Kagoshima University, Kagoshima, Japan

<sup>4</sup>Department of Clinical Pharmacology and Therapeutics, University of the Ryukyus School of Medicine, Okinawa, Japan

**\*Corresponding Author:** Akihiro Tokushige

Department of Prevention and Analysis of Cardiovascular Diseases, Graduate School of Medical and Dental  
Sciences, Kagoshima University, 8-35-1 Sakuragaoka, Kagoshima City, Kagoshima 890-8520, Japan

Tel: +81-99-275-5318

Fax: +81-99-265-8447

E-mail: [akihiro@med.u-ryukyu.ac.jp](mailto:akihiro@med.u-ryukyu.ac.jp)

**Online Table 1.** Univariate and multivariate logistic regression analysis for the frail (CFS  $\geq 5$ )

|                                    | Univariate        |                 | Multivariate       |                 |
|------------------------------------|-------------------|-----------------|--------------------|-----------------|
|                                    | OR (95%CI)        | <i>p</i> -value | OR (95%CI)         | <i>p</i> -value |
| Advanced age ( $\geq 75$ years)    | 3.56 (1.67-7.58)  | 0.001           | 7.87 (2.60-23.86)  | <0.001          |
| Male sex                           | 0.74 (0.35-1.57)  | 0.43            |                    |                 |
| BMI < 18.5 kg/m <sup>2</sup>       | 1.91 (0.70-5.18)  | 0.20            |                    |                 |
| History of PCI                     | 0.80 (0.37-1.70)  | 0.56            |                    |                 |
| History of OMI                     | 1.30 (0.64-2.66)  | 0.47            |                    |                 |
| History of stroke                  | 3.21 (1.47-7.01)  | 0.003           | 5.63 (1.82-17.41)  | 0.003           |
| History of heart failure           | 2.85 (1.29-6.30)  | 0.01            | 0.72 (0.23-2.26)   | 0.57            |
| Hypertension                       | 0.54 (0.24-1.18)  | 0.12            |                    |                 |
| Dyslipidemia                       | 0.67 (0.32-1.41)  | 0.29            |                    |                 |
| Diabetes Mellitus                  | 1.29 (0.64-2.58)  | 0.47            |                    |                 |
| Current-smoker                     | 1.18 (0.50-2.79)  | 0.70            |                    |                 |
| COPD                               | 1.94 (0.76-4.94)  | 0.17            |                    |                 |
| PAD                                | 3.20 (1.49-6.86)  | 0.003           | 2.18 (0.74-6.40)   | 0.15            |
| eGFR < 60mL/min/1.73m <sup>2</sup> | 1.80 (0.88-3.68)  | 0.11            |                    |                 |
| Hb < 11.0 g/dL                     | 3.08 (1.42-6.71)  | 0.005           | 1.18 (0.38-3.62)   | 0.78            |
| LVEF < 40%                         | 5.16 (2.07-12.90) | < 0.001         | 5.49 (1.51-19.86)  | 0.01            |
| LMCA or multivessel                | 1.28 (0.64- 2.57) | 0.49            |                    |                 |
| Serum albumin < 3.5 g/dL           | 8.61 (3.69-20.10) | <0.001          | 11.06 (3.55-34.49) | <0.001          |

CFS; clinical frailty scale, OR; odds ratio, CI; confidence interval, BMI; body mass index, PCI; percutaneous coronary intervention, OMI; old myocardial infarction, COPD; chronic obstructive pulmonary disease, PAD; peripheral artery disease, eGFR; estimated glomerular filtration rate, Hb; hemoglobin, LVEF; left ventricular ejection fraction, LMCA; left main coronary artery.

**Online Table 2a.** Clinical outcomes between the frail and non-frail group aged 65–74 years old.

|                                                | <b>All</b>                                                       | <b>Frail group</b> | <b>Non-frail group</b> | <b><i>p</i>-value</b> |
|------------------------------------------------|------------------------------------------------------------------|--------------------|------------------------|-----------------------|
|                                                | <b>(N=130)</b>                                                   | <b>(N=11)</b>      | <b>(N=119)</b>         |                       |
|                                                | <b>No. patients with events (cumulative 2-year incidence; %)</b> |                    |                        |                       |
| <b>MACE</b>                                    | 18 (12.2%)                                                       | 5 (48.9%)          | 13 (9.0%)              | <0.001                |
| <b>All-cause death</b>                         | 9 (6.0%)                                                         | 4 (42.3%)          | 5 (3.0%)               | <0.001                |
| Cardiovascular death                           | 5 (4.4%)                                                         | 4 (42.3%)          | 1 (1.2%)               | <0.001                |
| Non-cardiovascular death                       | 4 (1.6%)                                                         | 0 (0.0%)           | 4 (1.8%)               | 0.63                  |
| <b>Non-fatal MI</b>                            | 1 (0.9%)                                                         | 0 (0.0%)           | 1 (1.0%)               | 0.81                  |
| <b>Non-fatal stroke</b>                        | 2 (0.8%)                                                         | 0 (0.0%)           | 2 (0.9%)               | 0.73                  |
| <b>Heart failure requiring hospitalization</b> | 6 (4.7%)                                                         | 1 (9.1%)           | 5 (4.3%)               | 0.41                  |
| <b>Major bleeding (BARC type 3 or 5)</b>       | 2 (1.6%)                                                         | 0 (0.0%)           | 2 (1.7%)               | 0.68                  |
| Gastrointestinal bleeding                      | 1 (0.8%)                                                         | 0 (0.0%)           | 1 (0.9%)               | 0.78                  |
| Access site bleeding                           | 0 (0.0%)                                                         | 0 (0.0%)           | 0 (0.0%)               | 1.00                  |
| Intracranial bleeding                          | 0 (0.0%)                                                         | 0 (0.0%)           | 0 (0.0%)               | 1.00                  |
| Others                                         | 1 (0.8%)                                                         | 0 (0.0%)           | 1 (0.8%)               | 0.76                  |
| <b>Ischemic event (MI and ischemic stroke)</b> | 3 (1.7%)                                                         | 0 (0.0%)           | 3 (1.8%)               | 0.68                  |

The number of patients with events counted during the entire follow-up. A cumulative 2-year incidence was

estimated by the Kaplan-Meier method. MACE; major adverse cardiovascular event, MI; myocardial infarction,

BARC; Bleeding Academic Research Consortium.

**Online Table 2b.** Clinical outcomes between the frail and non-frail group aged  $\geq 75$  years old

|                                                | <b>All</b>                                                       | <b>Frail group</b> | <b>Non-frail group</b> | <b><i>p</i>-value</b> |
|------------------------------------------------|------------------------------------------------------------------|--------------------|------------------------|-----------------------|
|                                                | <b>(N=109)</b>                                                   | <b>(N=27)</b>      | <b>(N=82)</b>          |                       |
|                                                | <b>No. patients with events (cumulative 2-year incidence; %)</b> |                    |                        |                       |
| <b>MACE</b>                                    | 28 (20.3%)                                                       | 16 (48.2%)         | 12 (11.1%)             | <0.001                |
| <b>All-cause death</b>                         | 19 (16.0%)                                                       | 12 (38.0%)         | 7 (8.7%)               | <0.001                |
| Cardiovascular death                           | 4 (4.0%)                                                         | 1 (3.7%)           | 3 (4.0%)               | 0.88                  |
| Non-cardiovascular death                       | 15 (12.4%)                                                       | 11 (35.6%)         | 4 (5.0%)               | <0.001                |
| <b>Non-fatal MI</b>                            | 3 (2.0%)                                                         | 1 (4.8%)           | 2 (1.3%)               | 0.60                  |
| <b>Non-fatal stroke</b>                        | 2 (2.1%)                                                         | 1 (4.8%)           | 1 (1.4%)               | 0.30                  |
| <b>Heart failure requiring hospitalization</b> | 6 (3.0%)                                                         | 3 (9.3%)           | 3 (1.3%)               | 0.07                  |
| <b>Major bleeding (BARC type 3 or 5)</b>       | 8 (7.6%)                                                         | 5 (20.5%)          | 3 (3.7%)               | 0.005                 |
| Gastrointestinal bleeding                      | 3 (2.9%)                                                         | 2 (8.4%)           | 1 (1.2%)               | 0.06                  |
| Access site bleeding                           | 0 (0.0%)                                                         | 0 (0.0%)           | 0 (0.0%)               | 1.00                  |
| Intracranial bleeding                          | 2 (2.1%)                                                         | 1 (5.3%)           | 1 (1.3%)               | 0.27                  |
| Others                                         | 3 (2.8%)                                                         | 2 (8.4%)           | 1 (1.2%)               | 0.07                  |
| <b>Ischemic event (MI and ischemic stroke)</b> | 4 (3.1%)                                                         | 1 (4.8%)           | 3 (2.6%)               | 0.83                  |

The number of patients with events counted during the entire follow-up. A cumulative 2-year incidence was

estimated by the Kaplan-Meier method. MACE; major adverse cardiovascular event, MI; myocardial infarction,

BARC; Bleeding Academic Research Consortium.

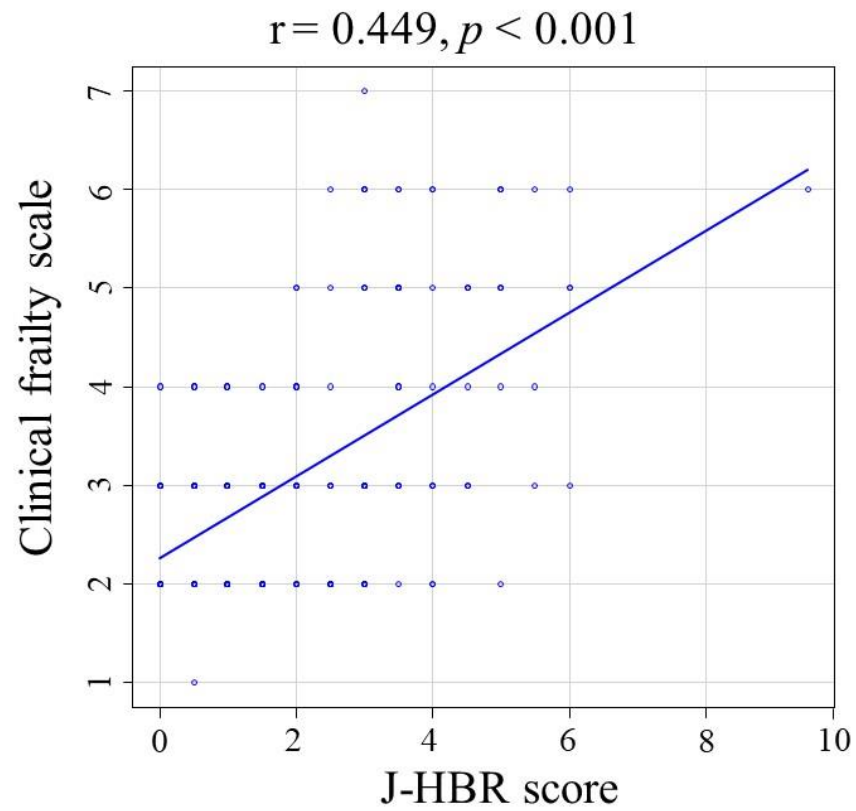

**Online Figure 1.** Correlation analysis between the Japanese version of high bleeding risk (J-HBR) score and the clinical frailty scale (CFS).

a

## MACE (65–74 years)

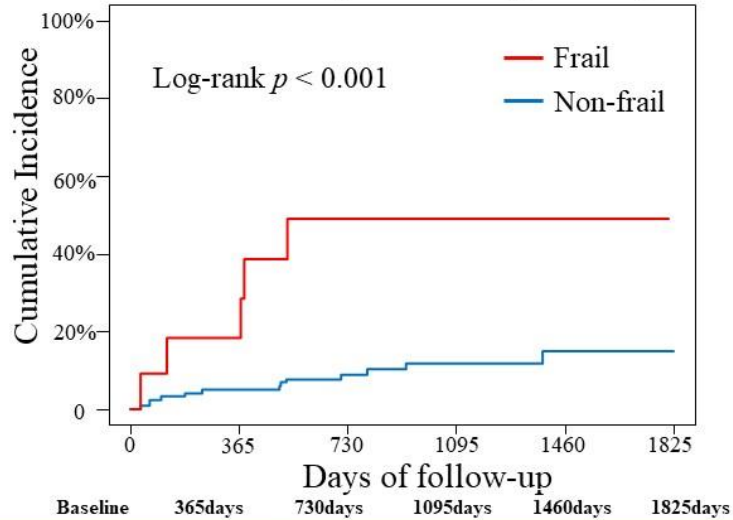Frail (CFS  $\geq 5$ )

|                         |    |       |       |       |       |
|-------------------------|----|-------|-------|-------|-------|
| No patients with events |    | 2     | 5     | 5     | 5     |
| No patients at risk     | 11 | 8     | 3     | 2     | 2     |
| Cumulative incidence    |    | 18.2% | 48.9% | 48.9% | 48.9% |

Non-frail (CFS  $< 5$ )

|                         |     |      |      |       |       |       |
|-------------------------|-----|------|------|-------|-------|-------|
| No patients with events |     | 6    | 10   | 12    | 13    | 13    |
| No patients at risk     | 119 | 113  | 76   | 45    | 21    | 4     |
| Cumulative incidence    |     | 5.0% | 9.0% | 11.8% | 14.9% | 14.9% |

b

MACE ( $\geq 75$  years)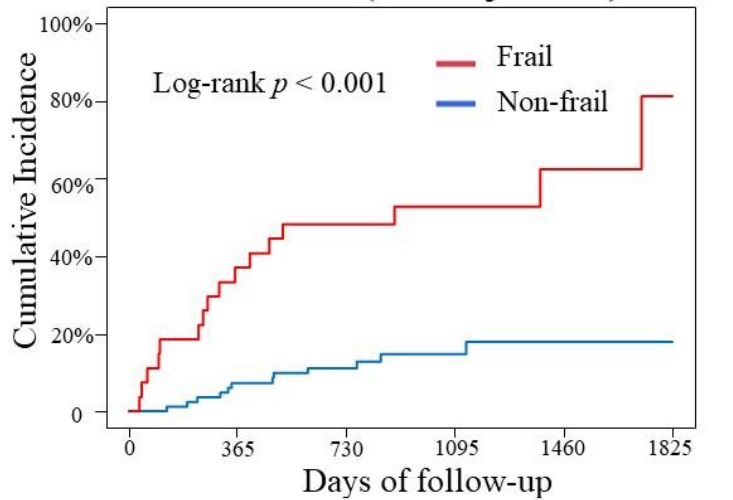Frail (CFS  $\geq 5$ )

|                         |    |       |       |       |       |       |
|-------------------------|----|-------|-------|-------|-------|-------|
| No patients with events |    | 10    | 13    | 14    | 15    | 16    |
| No patients at risk     | 27 | 17    | 12    | 6     | 3     | 1     |
| Cumulative incidence    |    | 37.0% | 48.2% | 52.9% | 62.3% | 81.1% |

Non-frail (CFS  $< 5$ )

|                         |    |      |       |       |       |       |
|-------------------------|----|------|-------|-------|-------|-------|
| No patients with events |    | 6    | 9     | 11    | 12    | 12    |
| No patients at risk     | 82 | 76   | 54    | 31    | 11    | 1     |
| Cumulative incidence    |    | 7.3% | 11.1% | 14.6% | 17.7% | 17.7% |

c

## Survival (65–74 years)

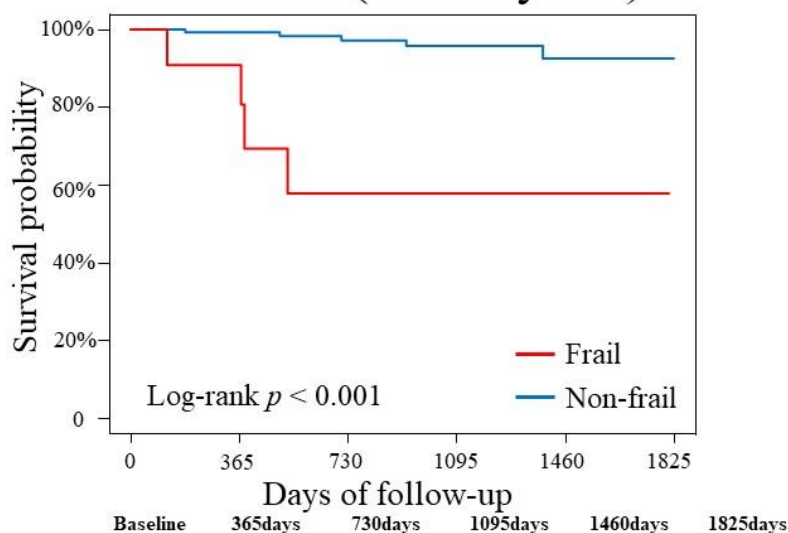Frail (CFS  $\geq 5$ )

|                         |    |       |       |       |       |
|-------------------------|----|-------|-------|-------|-------|
| No patients with events |    | 1     | 4     | 4     | 4     |
| No patients at risk     | 11 | 9     | 3     | 2     | 2     |
| Survival probability    |    | 90.9% | 57.7% | 57.7% | 57.7% |

Non-frail (CFS  $< 5$ )

|                         |     |       |       |       |       |       |
|-------------------------|-----|-------|-------|-------|-------|-------|
| No patients with events |     | 1     | 3     | 4     | 5     | 5     |
| No patients at risk     | 119 | 118   | 80    | 48    | 21    | 4     |
| Survival probability    |     | 99.2% | 97.0% | 95.6% | 92.2% | 92.2% |

d

Survival ( $\geq 75$  years)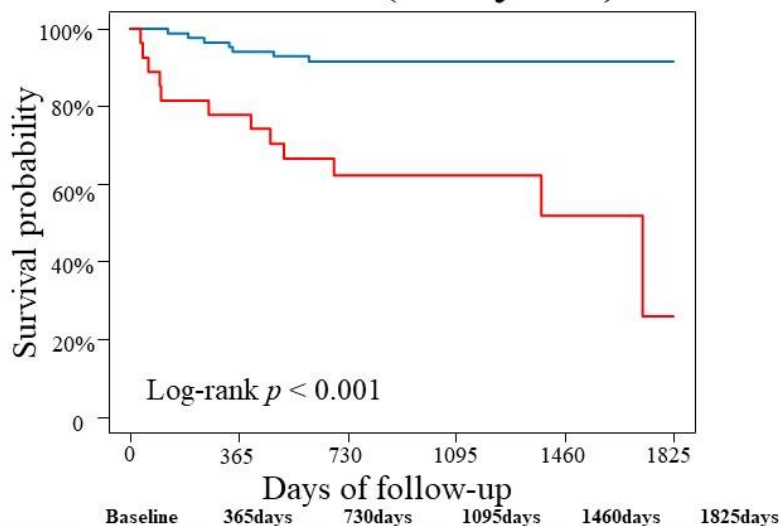Frail (CFS  $\geq 5$ )

|                         |    |       |       |       |       |       |
|-------------------------|----|-------|-------|-------|-------|-------|
| No patients with events |    | 6     | 10    | 10    | 11    | 12    |
| No patients at risk     | 27 | 21    | 14    | 8     | 4     | 1     |
| Survival probability    |    | 77.8% | 62.0% | 62.0% | 51.7% | 25.9% |

Non-frail (CFS  $< 5$ )

|                         |    |       |       |       |       |       |
|-------------------------|----|-------|-------|-------|-------|-------|
| No patients with events |    | 5     | 7     | 7     | 7     | 7     |
| No patients at risk     | 82 | 77    | 54    | 32    | 11    | 1     |
| Survival probability    |    | 93.9% | 91.3% | 91.3% | 91.3% | 91.3% |



**Online Figure 2.** Kaplan–Meier analysis of the cumulative incidence of the primary outcome measure and survival probability between the two groups, the frail group (CFS  $\geq 5$ ), and the non-frail (CFS  $< 5$ ). (a) The primary outcome measure between the two groups (in patients 65–74 years old). (b) The primary outcome measure between the two groups (in patients  $\geq 75$  years old). (c) Survival probability between the two groups (in patients 65–74 years old). (d) Survival probability between the two groups (in patients  $\geq 75$  years old).

MACE; major adverse cardiovascular event, CFS; clinical frailty scale.

## Causes of all-cause

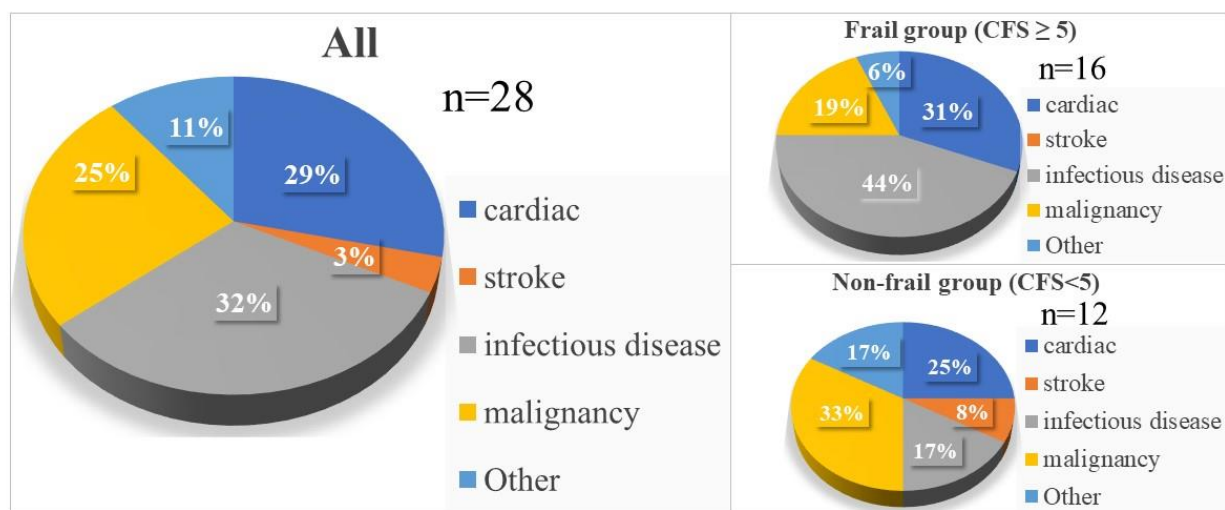

**Online Figure 3.** Cause of all-cause death between the two groups, the frail group (CFS  $\geq 5$ ) and the non-frail group (CFS < 5).

CFS; clinical frailty scale.

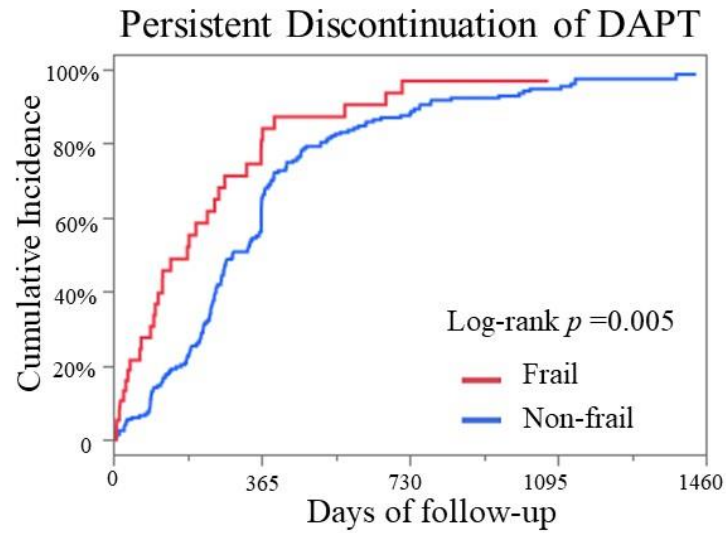

|                                            | Baseline | 365days | 730days | 1095days | 1460days |
|--------------------------------------------|----------|---------|---------|----------|----------|
| <b>Frail (CFS <math>\geq 5</math>)</b>     |          |         |         |          |          |
| No patients with discontinuation           |          | 26      | 32      |          |          |
| No patients at risk                        | 38       | 8       | 1       |          |          |
| Cumulative incidence                       |          | 77.6%   | 96.8%   |          |          |
| <b>Non-frail (CFS <math>&lt; 5</math>)</b> |          |         |         |          |          |
| No patients with discontinuation           |          | 109     | 167     | 179      |          |
| No patients at risk                        | 201      | 82      | 22      | 8        |          |
| Cumulative incidence                       |          | 56.1%   | 87.6%   | 94.8%    |          |

**Online Figure 4.** Kaplan–Meier analysis for the persistent discontinuation of DAPT between the two groups, the frail group (CFS  $\geq 5$ ) and the non-frail group (CFS  $< 5$ ).

DAPT; Dual Antiplatelet therapy, CFS; clinical frailty scale.

## a Major Bleeding (65–74 years)

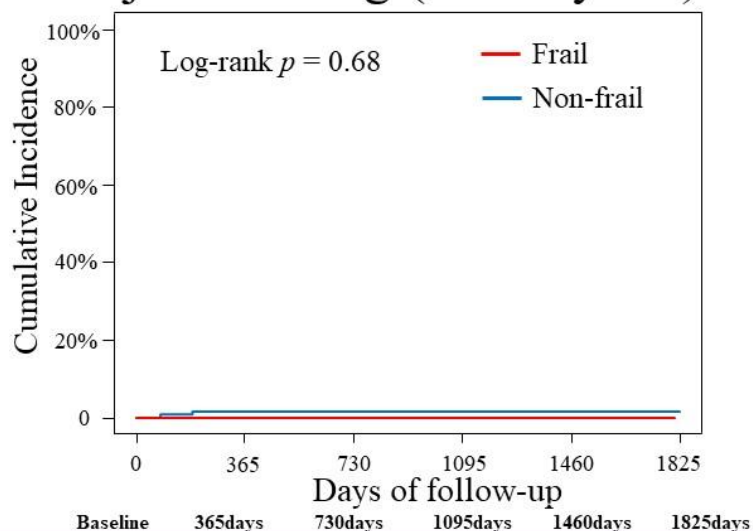

### Frail (CFS $\geq 5$ )

|                         |      |      |      |      |
|-------------------------|------|------|------|------|
| No patients with events | 0    | 0    | 0    | 0    |
| No patients at risk     | 11   | 9    | 3    | 2    |
| Cumulative incidence    | 0.0% | 0.0% | 0.0% | 0.0% |

### Non-frail (CFS $< 5$ )

|                         |      |      |      |      |      |
|-------------------------|------|------|------|------|------|
| No patients with events | 2    | 2    | 2    | 2    | 2    |
| No patients at risk     | 119  | 116  | 78   | 48   | 21   |
| Cumulative incidence    | 1.7% | 1.7% | 1.7% | 1.7% | 1.7% |

## b Major Bleeding ( $\geq 75$ years)

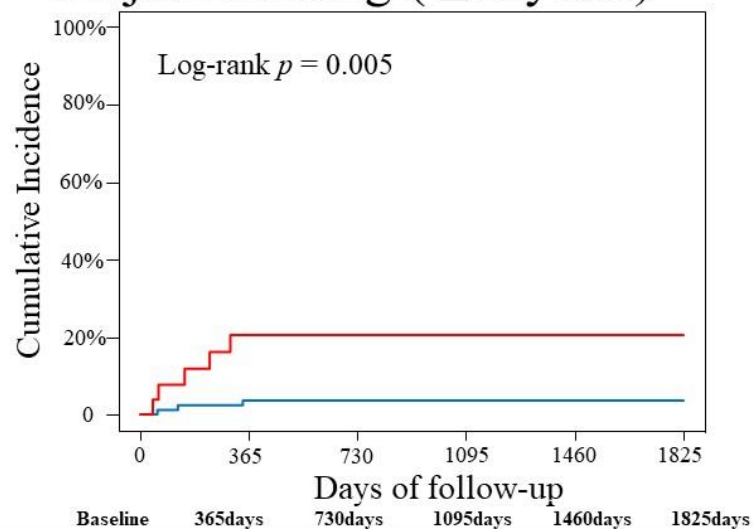

### Frail (CFS $\geq 5$ )

|                         |       |       |       |       |       |
|-------------------------|-------|-------|-------|-------|-------|
| No patients with events | 5     | 5     | 5     | 5     | 5     |
| No patients at risk     | 27    | 18    | 13    | 7     | 3     |
| Cumulative incidence    | 20.5% | 20.5% | 20.5% | 20.5% | 20.5% |

### Non-frail (CFS $< 5$ )

|                         |      |      |      |      |      |
|-------------------------|------|------|------|------|------|
| No patients with events | 3    | 3    | 3    | 3    | 3    |
| No patients at risk     | 82   | 77   | 54   | 32   | 11   |
| Cumulative incidence    | 3.7% | 3.7% | 3.7% | 3.7% | 3.7% |

### c Myocardial infarction and ischemic stroke (65–74 years)

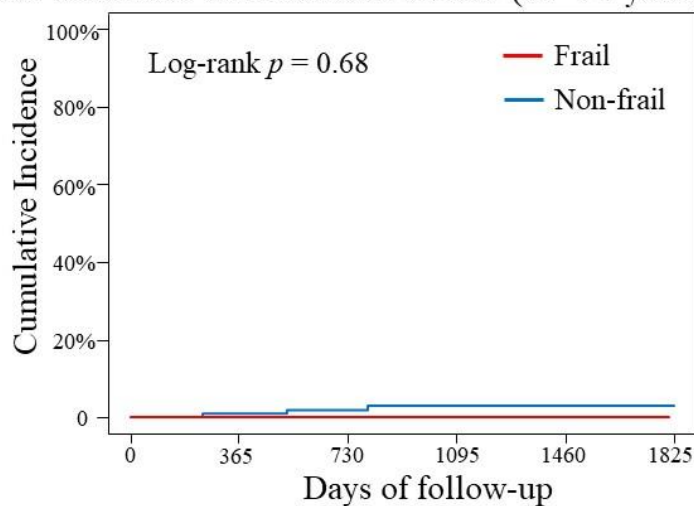

|                                            | Baseline | 365days | 730days | 1095days | 1460days | 1825days |
|--------------------------------------------|----------|---------|---------|----------|----------|----------|
| <b>Frail (CFS <math>\geq 5</math>)</b>     |          |         |         |          |          |          |
| No patients with events                    |          | 0       | 0       | 0        | 0        |          |
| No patients at risk                        | 11       | 9       | 3       | 2        | 2        |          |
| Cumulative incidence                       |          | 0.0%    | 0.0%    | 0.0%     | 0.0%     |          |
| <b>Non-frail (CFS <math>&lt; 5</math>)</b> |          |         |         |          |          |          |
| No patients with events                    |          | 1       | 2       | 3        | 3        | 3        |
| No patients at risk                        | 119      | 117     | 78      | 47       | 21       | 4        |
| Cumulative incidence                       |          | 0.9%    | 1.8%    | 3.2%     | 3.2%     | 3.2%     |

### d Myocardial infarction and ischemic stroke ( $\geq 75$ years)

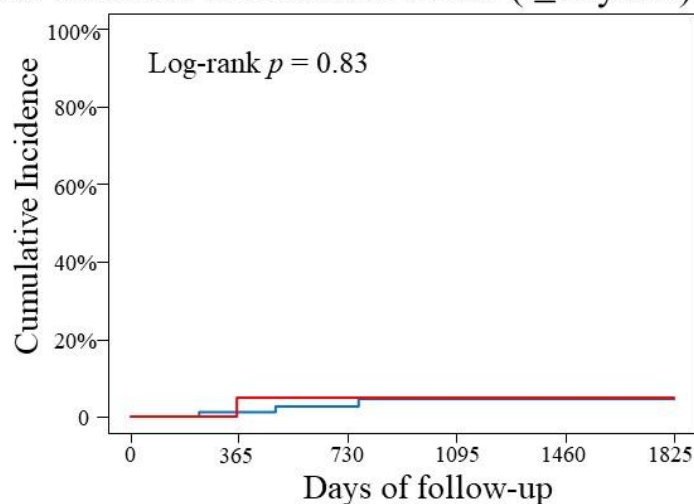

|                                            | Baseline | 365days | 730days | 1095days | 1460days | 1825days |
|--------------------------------------------|----------|---------|---------|----------|----------|----------|
| <b>Frail (CFS <math>\geq 5</math>)</b>     |          |         |         |          |          |          |
| No patients with events                    |          | 1       | 1       | 1        | 1        | 1        |
| No patients at risk                        | 27       | 20      | 13      | 7        | 3        | 1        |
| Cumulative incidence                       |          | 4.8%    | 4.8%    | 4.8%     | 4.8%     | 4.8%     |
| <b>Non-frail (CFS <math>&lt; 5</math>)</b> |          |         |         |          |          |          |
| No patients with events                    |          | 1       | 2       | 3        | 3        | 3        |
| No patients at risk                        | 82       | 77      | 54      | 31       | 11       | 1        |
| Cumulative incidence                       |          | 1.2%    | 2.6%    | 4.5%     | 4.5%     | 4.5%     |

**Online Figure 5.** Kaplan–Meier analysis of the cumulative incidence of the secondary outcome measure between the two groups, the frail group ( $\text{CFS} \geq 5$ ), and the non-frail ( $\text{CFS} < 5$ ).

(a) The secondary bleeding outcome measure between the two groups (in patients 65–74 years old).

(b) The secondary bleeding outcome measure between the two groups (in patients  $\geq 75$  years old).

(c) The secondary ischemic outcome measure between the two groups (in patients 65–74 years old).

(d) The secondary ischemic outcome measure between the two groups (in patients  $\geq 75$  years old).

CFS; clinical frailty scale.
